# Supplementary material for: X-Ray fluorescence imaging and other analyses identify selenium and GPX1 as important in female reproductive function
Source: Royal Society of Chemistry journal article supplement (doi:10.1039/c4mt00228h), 2014-10-23
Supplement: c4mt00228h1.xlsx [file c4mt00228h1.xlsx]

## Sheet: Elemental concentrations
Healthy							Size classifications
#	Image	Fe	Zn	Se	Br		Small	S	<4mm
12/R24 (#42406) FINE 15mm							Small-medium	SM	4-8mm
	Zn-Zn	13.2	22.3	0.01	13.87		Medium-large	ML	8-10mm
2	Se-Se	70.8	12.2	4.24	10.7		Large	L	10-16mm
12/R36 Area 2 (#42445) FINE 13mm							Preovulatory	P	>16mm
	Zn-Zn	12.3	28	6.55	27
2	Se-Se	74.5	26.3	7.59	26.9
12/R41 Area 1 (#42412) small
	Zn-Zn	0	15.5	0	3.73
2	Se-Se	106	2.72	1.76	2.59
12/R31 Area 2 (#42415) small
	Zn-Zn	9.3	17.4	0	5.53
2	Se-Se	67.4	5.28	1	4.59
4	Fe-Fe	80.7	6.86	-1.33	5.55
5	Fe-Fe	48.5	3	-1.78	5.09
12/R26 (#42421) FINE 15mm
	Zn-Zn	7.1	13.9	0.58	8.71
2	Se-Se	69.1	8.91	2.05	10.1
12/R27 (#42446) FINE 18mm
	Zn-Zn	10	16.2	0.44	13.48
2	Se-Se	73.5	10.5	2.33	15.8
12/R31 Area 1 (#42414) 15mm
	Zn-Zn	8.8	15.2	0.62	9.51
2	Se-Se	71.2	7.74	4.31	11.6
12/R32 (#42405) FINE 18mm
	Zn-Zn	19.1	19.9	0	22.78
2	Se-Se	72.9	10	1.17	12.7
12/R33 (#42442)13mm FINE
	Zn-Zn	10.7	16.6	0.45	10.77
2	Se-Se	76.9	10.4	2.89	8.12
12/R38 (#42427) 12mm
	Zn-Zn	23.5	16.3	0.18	0
2	Se-Se	80.6	7.42	3.2	5.33
12/R42 (#42429) 13.5mm
	Zn-Zn	15.7	24.4	0.59	13.31
2	Se-Se	104	13.2	6.1	18
12/R48 (#42435) 12mm
	Zn-Zn	26.8	17.9	0.3	13.8
2	Se-Se	92.9	7.68	2.96	8.31
12/R55 (#42428) 9mm
	Zn-Zn	0	23	0	3.39
2	Se-Se	74.8	9.87	1.3	2.75
12/R56b Area 2 (#42431) 5mm
	Zn-Zn	13.9	34	0	23.13
2	Se-Se	98.9	13.7	2.43	13.9
MEAN		12.1714	20.0429	3.095	12.4529
STANDARD DEV		7.62258	5.71768	1.90772	7.44348
Total number of follicles (n=14), total number of large follicles (n=10)
Percentage of large (>10mm) healthy follicles showing a distinct pattern of Se in the granulosa cells:										100
Atretic
#	Image	Fe	Zn	Se	Br
12/R28 (#42396) 21mm
	Zn-Zn	10.8	12.1	0	17.65
0	Se-Se	80	2.73	1.26	6.33
12/R29 AVERAGE #42401,#42402 15mm
1	Zn-Zn	7.85	15.75	0	13.215
2	Se-Se	66.35	3.92	1.205	7.215
12/R30 Area 2 (#42410) 15mm
	Zn-Zn	9.7	16.2	0	12.68
2	Se-Se	69.5	5.46	2	5.34
12/R34 (#42420) FINE 19mm
	Zn-Zn	9.2	19	3.01	10.31
2	Se-Se	69.2	19.7	4.89	21.2
12/R41 Area 2 (#42413) 17mm
	Zn-Zn	5.8	16.5	0	5.49
2	Se-Se	67.6	2.92	0.56	2.68
12/R43 (#42418) 16mm
	Zn-Zn	16.3	21.9	1.11	12.85
2	Se-Se	74.8	11.6	6.48	14.6
12/R44 (#42441) FINE 11mm
	Zn-Zn	0	11.9	1.19	4.57
2	Se-Se	81.8	9.23	4	5.64
12/R45 (#42407) 14mm
	Zn-Zn	8.8	21	0	11.65
2	Se-Se	69.8	8.01	2.05	5.44
12/R47 Area 1 (#42433) 11mm
	Zn-Zn	12.2	14.6	0	7.84
2	Se-Se	95.2	5.96	2.8	6.1
12/R47 Area 2 (#42434) edge of follicle
	Zn-Zn	23	18.8	0	10.4
2	Se-Se	96.7	9.1	2.55	4.94
12/R49 (#42436) 10mm
	Zn-Zn	8.2	20.5	0	8.45
2	Se-Se	87.7	7.57	2.25	5.24
12/R50 (#42426) 11mm
	Zn-Zn	10	16.2	0.44	13.48
2	Se-Se	73.5	10.5	2.33	15.8
12/R56b Area 1 (#42430) 7mm
	Zn-Zn	2.1	34.1	0	9.5
2	Se-Se	99.5	13.9	2.86	11.8
MEAN		9.53462	18.35	2.71038	10.6219
STANDARD DEV		5.78386	5.67957	1.60653	3.55161
Total number of follicles (n=13), total number of large follicles (n=10)
Percentage of large (>10mm) atretic follicles showing a distinct pattern of Se in the granulosa cells:										30
Regressing
#	Image	Fe	Zn	Se	Br
12/R35 (#42419) 17mm
	Zn-Zn	0.9	14.2	0	7.2
2	Se-Se	68.4	4	1.29	4.51
12/R39 (#42422) FINE 15mm
	Zn-Zn	6.7	23.8	0	4.56
2	Se-Se	66.1	3.83	0.17	0.97
MEAN		3.8	19	0.73	5.88
STANDARD DEV		4.10122	6.78823	0.79196	1.86676
Total number of follicles (n=2), total number of large follicles (n=2)
Percentage of regressing follicles showing a distinct pattern of Se in the granulosa cells:									0
