# Supplementary material for: X-Ray fluorescence imaging and other analyses identify selenium and GPX1 as important in female reproductive function
Source: Royal Society of Chemistry journal article supplement (doi:10.1039/c4mt00228h), 2014-10-23
Supplement: c4mt00228h2.xlsx [file c4mt00228h2.xlsx]

## Sheet: Granulosa
								small healthy
								aligned					loopy					large healthy				small atretic
Probeset ID	Gene Symbol	Gene Title	RefSeq Transcript ID	p-value(large healthy vs. small healthy)	Fold-Change(large healthy vs. small healthy)	p-value(small atretic vs. small healthy)	Fold-Change(small atretic vs. small healthy)	affs513-1-1-230306.CEL	affs513-2-2-230306.CEL	affs513-3-3-230306.CEL	affs513-4-4-230306.CEL	affs513-5-5-230306.CEL	affs513-6-11-230306.CEL	affs513-7-12-230306.CEL	affs513-8-13-230306.CEL	affs513-9-14-230306.CEL	affs513-10-15-230306.CEL	Mean small healthy	affs513-11-21-230306.CEL	affs513-12-22-230306.CEL	affs513-14-25-230306.CEL	affs513-15-26-230306.CEL	Mean large healthy	NH_SGCA1_(Bovine).CEL	NH_SGCA2_(Bovine).CEL	NH_SGCA3_(Bovine).CEL	NH_SGCA4_(Bovine).CEL	NH_SGCA6_(Bovine).CEL	Mean small atretic	Mean	SEM
Bt.4317.1.S1_at	GPX1	glutathione peroxidase 1	NM_174076	7.66233e-05	1.48797	0.0479277	-1.16139	12.2078	12.3655	12.2054	12.3509	12.5264	12.0255	12.3015	12.3417	12.4177	12.6356	9.10034	12.9348	13.059	12.962	12.6888	9.82367	12.3307	11.8807	12.3475	11.9009	12.1499	9.02546	11.518	2.6424
Bt.4205.1.S1_at	GPX4	glutathione peroxidase 4 (phospholipid hydroperoxidase)	NM_174770	0.359542	1.25813	0.143173	1.41481	10.0118	11.1121	10.4055	10.5045	11.3889	9.15099	10.8041	10.859	10.8925	10.8269	10.5956	11.1436	10.6677	11.1523	10.744	10.9269	11.6264	11.5666	10.1962	11.5456	10.5464	11.0962	10.3674	2.37844
Bt.11662.1.A1_at	GPX7	glutathione peroxidase 7	NM_001101113	0.518908	-1.06532	0.0160827	1.26994	9.03738	8.96013	8.95091	9.36245	9.36495	8.94086	8.74082	8.95523	9.57348	9.12703	9.10132	8.80187	9.05132	8.97094	9.216	9.01003	9.69948	9.23033	9.67912	9.31802	9.30349	9.44609	8.80296	2.01954
Bt.12916.1.S1_at	GPX3	glutathione peroxidase 3 (plasma)	NM_174077	0.00875746	3.2449	0.000295948	-5.36302	7.96139	7.6031	9.05455	8.949	9.02904	7.6605	7.74234	9.2622	8.99724	10.0927	8.63521	9.5997	10.5954	10.5558	10.5826	10.3334	6.58341	4.46856	7.8027	5.10168	7.10445	6.21216	7.83418	1.79728
Bt.29621.1.S1_at	GPX2	glutathione peroxidase 2	NM_001163139	0.000352365	-1.67259	5.40572e-11	-5.04785	7.93632	7.42868	7.9011	7.65393	6.9997	7.55647	7.86966	7.82225	7.64381	7.20177	7.60137	6.93165	7.03692	6.98203	6.48653	6.85928	5.57773	5.09091	5.08732	5.25016	5.32238	5.2657	6.32691	1.45149
Bt.4317.2.A1_at	GPX1	glutathione peroxidase 1	NM_174076	0.000153513	1.83187	0.692719	1.04689	5.70894	5.96157	5.51378	5.65196	6.38126	5.43473	6.36333	5.76227	5.60497	6.24591		6.55344	6.77202	6.95161	6.6677		5.81217	5.66429	6.2883	6.02747	5.85271		5.81327	1.33365
Bt.9614.1.S1_at	SEP15	15 kDa selenoprotein	NM_001034759	0.0732396	1.23644	0.370624	1.09901	10.5025	10.9323	10.5784	10.8393	11.0224	10.3568	10.7606	10.8683	10.9844	10.7756	10.7621	10.5195	11.1457	11.1323	11.4755	11.0682	11.1908	11.0142	10.6153	11.0265	10.6445	10.8983	10.4234	2.39129
Bt.2220.2.A1_a_at	SEPP1	selenoprotein P, plasma, 1	NM_174459	0.978052	-1.00881	0.000340533	3.73225	8.9055	7.88209	9.68386	9.91483	9.34585	10.8485	9.05315	9.5474	9.40474	10.2116	7.49872	9.5165	9.99679	8.20354	10.1515	7.11876	11.5363	11.8164	10.9068	11.9714	10.668	7.93848	9.45066	2.16813
Bt.7358.1.S1_at	SELH	selenoprotein H	NM_001164092	0.164516	1.2505	0.00108669	1.75904	8.81832	9.90395	8.90267	9.36029	9.66104	8.70757	9.37012	9.30789	9.86643	9.38812	9.32864	10.0489	9.63849	9.52959	9.38755	9.65113	10.3991	10.5451	9.74467	10.0965	9.93181	10.1434	9.24304	2.1205
Bt.3742.1.S1_at	SELK	selenoprotein K	NM_001037489	3.97476e-05	1.90393	5.15733e-05	1.78952	8.21436	9.10785	8.40962	8.87602	9.08696	8.5102	8.79738	8.65217	9.1913	8.83694	8.76828	9.57205	9.61319	9.74579	9.85801	9.69726	9.53739	9.85724	9.35565	9.91318	9.37581	9.60785	8.85301	2.03102
Bt.15696.1.S1_at	SELS	selenoprotein S	NM_001046114	0.000107199	2.22127	0.000118997	2.07787	8.13056	9.06797	8.19442	8.79768	9.11955	7.99451	8.20858	8.4535	9.17646	8.98627	8.61295	10.0332	9.47156	9.6068	9.94577	9.76433	9.8196	9.82134	9.36681	9.8142	9.51832	9.66805	8.81738	2.02284
Bt.3240.1.S1_at	SELT	selenoprotein T	NM_001103103	0.327622	1.2033	0.670292	-1.07637	8.70166	9.3687	8.71358	9.02383	9.4751	7.84791	8.62834	9.11351	9.54632	8.9035	8.93224	8.88628	9.25327	9.17889	9.47854	9.19925	9.037	9.28927	8.49855	9.05082	8.25474	8.82608	8.51386	1.95321
Bt.3427.1.S1_at	SEPX1	selenoprotein X, 1	NM_001034810	0.507611	-1.08759	0.130049	1.20088	7.79094	8.18677	7.583	8.079	8.15046	7.57954	7.80477	7.87786	7.97415	8.05973	7.90862	7.62633	7.70181	8.07455	7.74728	7.78749	8.28881	8.69824	7.52833	8.4951	7.85306	8.17271	7.63621	1.75187
Bt.1605.2.S1_at	SEPN1	selenoprotein N, 1	NM_001114976	0.321072	1.09052	0.00100037	1.36963	7.25938	6.95624	7.29084	7.13765	7.56358	7.23331	7.0226	7.12394	7.20359	7.7793	6.2104	7.38534	7.50859	7.0998	7.53449	6.22482	7.6899	7.7319	7.71615	7.78807	7.62812	6.11483	7.0208	1.61068
Bt.19491.1.S1_at	SELM	selenoprotein M	NM_001163171	0.000712049	2.85528	0.00347393	2.21759	6.28977	6.94232	5.56661	6.79632	7.53636	6.05511	6.29885	6.03512	7.07186	7.30792	6.29585	8.36744	8.25548	7.92767	7.86404	6.71749	8.17135	8.34617	6.85737	8.31229	7.00792	6.37004	6.92004	1.58757
Bt.1605.3.S1_at	SEPN1	Selenoprotein N, 1	NM_001114976	0.513931	-1.03976	0.0185601	-1.15223	6.20488	5.96405	6.14577	6.11608	5.86893	6.16958	5.88967	6.06339	6.11037	6.07815		6.18789	6.00651	5.94866	5.87627		5.71558	6.00057	6.07516	5.60907	5.8829		5.63806	1.29346
Bt.19491.2.A1_at	SELM	selenoprotein M	NM_001163171	0.00323084	-1.59146	4.17006e-05	-2.00083	6.42196	5.88767	6.17745	5.95638	5.46457	6.42123	6.47279	5.85042	5.99597	5.36825		5.40061	5.37236	5.38579	5.1665		4.8201	5.25678	5.01096	5.30891	4.60858		5.21732	1.19694
Bt.1605.1.S1_at	SEPN1	selenoprotein N, 1	NM_001114976	0.80333	-1.01783	2.9813e-05	-1.45002	5.48025	5.28529	5.32989	5.35837	4.9803	5.28104	5.75598	5.32478	5.1606	5.17417		5.26758	5.42038	5.24669	5.21562		4.90728	4.82525	4.79939	4.76861	4.58444		4.83579	1.10941
Bt.16924.1.A1_at	SEPP1	selenoprotein P, plasma, 1	NM_174459	0.014898	-1.67859	0.000981754	-2.02862	6.02605	5.30136	5.66646	5.58687	4.85957	5.82191	5.80521	5.73875	5.44828	4.92234		5.03191	4.86	4.7453	4.44451		4.27839	4.76047	3.85043	5.56702	4.02959		4.73579	1.08646
Bt.18340.1.A1_at	CEPT1	choline/ethanolamine phosphotransferase 1	NM_001193130 /// XM_002686145 /// XM_868988	0.183509	1.22729	0.397014	1.12604	8.39358	8.50494	9.18697	8.58797	9.23546	8.54465	8.5474	9.30711	8.62573	9.17119	8.8105	8.94417	9.42944	8.84221	9.2081	9.10598	9.08784	8.53328	9.33538	8.57173	9.38055	8.98176	8.56728	1.96547
Bt.5112.1.A1_a_at	SEPHS2	selenophosphate synthetase 2	NM_001114732	3.99841e-05	1.68366	0.00756081	1.30107	7.07764	7.56949	7.34575	7.46216	7.90719	6.94934	7.16534	7.56565	7.3683	7.47643	7.38873	8.16825	8.0953	8.34203	7.95573	8.14033	7.79282	7.67268	7.88132	7.88011	7.61519	7.76842	7.36913	1.69059
Bt.5534.1.S1_at	TXNRD1	thioredoxin reductase 1	NM_174625	0.918638	-1.01436	0.000359239	1.77356	8.41351	9.48223	8.78416	8.99443	9.5362	8.54722	8.79387	9.00917	9.13314	9.55074	9.02447	9.14854	9.23997	8.75606	8.87104	9.0039	10.0807	9.9956	9.59663	9.89298	9.68967	9.85112	8.87808	2.03677
Bt.4008.1.S1_at	TXNRD2	thioredoxin reductase 2	NM_174626	0.00529486	1.683	0.0453906	1.38313	5.72276	6.30249	5.48448	5.84411	6.88159	5.42533	5.38814	6.02405	6.03726	6.55004	5.41895	6.88616	6.54212	6.73215	6.7078	5.53129	6.78746	6.41666	6.19798	6.36297	6.40474	5.45978	5.95598	1.3664
Bt.13094.1.A1_at	TXNRD3	thioredoxin reductase 3	NM_001192109 /// XM_002697151 /// XM_583261	0.000439062	-1.951	1.359e-06	-2.84856	7.20002	6.57539	6.93184	6.61614	5.71011	6.76564	6.72745	6.74734	6.45165	5.81567	5.65467	5.78615	5.60915	5.37685	5.5875	5.23756	4.78815	4.94388	5.2897	5.18788	5.00984	5.28539	5.50746	1.2635
Bt.13094.1.S1_at	TXNRD3	thioredoxin reductase 3	NM_001192109 /// XM_002697151 /// XM_583261	0.250033	1.09429	9.80627e-07	1.70727	4.65239	4.69443	4.55327	4.91929	5.04381	4.86653	4.39934	4.71725	4.92243	4.78335		5.16276	4.74831	4.81898	4.81076		5.25652	5.56933	5.65481	5.52319	5.63065		4.82173	1.10618
Bt.26270.1.A1_at	TXNRD2	thioredoxin reductase 2	NM_174626	0.00068874	-1.4403	0.00430097	-1.30702	5.13633	4.57594	5.06786	4.94937	4.51721	4.97361	5.20463	4.93764	4.89002	4.46621		4.34589	4.32909	4.43155	4.27553		4.39529	4.69736	4.32137	4.57407	4.43992		4.36109	1.0005
Bt.25682.1.A1_at	DIO1	deiodinase, iodothyronine, type I	NM_001122593 /// XM_001252654	0.0339574	-1.22664	0.0239303	-1.22564	5.38316	5.0786	5.01788	4.95056	4.80133	5.27889	5.43442	4.94408	5.20767	4.78009	5.47201	4.71745	4.73342	4.89863	4.82232	4.72228	4.49844	5.05968	4.76207	5.0211	4.62939	4.50836	4.68127	1.07396
Bt.13310.1.S1_at	DIO1	deiodinase, iodothyronine, type I	NM_001122593	0.000680938	-1.32548	1.40426e-08	-1.91917	5.61924	5.23192	5.51191	5.31181	5.12819	5.49939	5.34429	5.25672	5.33006	4.98373		4.92518	4.91508	4.93138	4.8892		4.20058	4.52509	4.37428	4.56489	4.24138		4.64326	1.06524
Bt.19907.1.A1_at	DIO1	deiodinase, iodothyronine, type I	NM_001122593	5.07157e-05	-2.92406	9.96502e-06	-3.15348	6.7298	5.767	6.26781	6.27662	4.96885	6.36517	6.44995	6.20489	6.04574	4.99068		4.59615	4.37002	4.65398	4.21457		4.08483	4.72507	4.54289	4.33303	4.06272		4.82481	1.10689
	Highly and stably expressed throughout most tissues
AFFX-Bt-gapd-5_at	GAPDH	glyceraldehyde-3-phosphate dehydrogenase	NM_001034034	0.0463183	1.59579	0.0817547	1.45083	11.676	12.606	11.6032	12.4789	12.9062	10.9742	11.9123	11.9345	12.5829	12.6577	12.2709	12.5781	12.7251	13.1932	12.7334	12.8048	12.9813	12.9973	11.9485	13.0071	12.4162	12.5328	11.929	2.73671
AFFX-Bt-gapd-M_at	GAPDH	glyceraldehyde-3-phosphate dehydrogenase	NM_001034034	0.121808	1.31371	0.954564	-1.00899	12.2435	12.6336	12.1864	12.5397	12.9336	11.4653	12.5016	12.3117	12.6355	12.6344		12.7347	12.616	13.1628	12.6952		12.7846	12.7096	11.6471	12.7584	12.0784		11.8132	2.71012
	Not expressed in granulosa
Bt.3985.1.S1_at	CYP17A1 /// CYP17A1 /// LOC784256 /// LOC784299 /// LOC785462	cytochrome P450, subfamily XVII /// cytochrome P450, family 17, subfamily A, pol	NM_174304 /// XM_001250368 /// XM_001250420 /// XM_001251231 /// XM_001253477	0.0729262	1.25999	0.300642	-1.12663	5.59702	5.27258	5.67278	5.51771	5.18645	5.35821	5.6627	5.57552	5.38986	5.43092	5.46637	5.85325	5.55793	5.24264	6.54534	5.79979	5.55389	5.23374	5.19758	5.48668	4.99993	5.29436	5.20338	1.19374
	Granulosa specific gene
Bt.4447.1.S1_at	CYP19A1	cytochrome P450, family 19, subfamily A, polypeptide 1	NM_174305	3.96717e-05	14.1566	4.15528e-06	-19.7756	8.8408	10.3773	8.25749	10.2453	9.70015	6.62962	9.82286	8.56393	11.0268	8.79858	7.79904	12.4963	13.1487	13.263	13.2907	11.5714	7.13053	4.22354	4.67523	4.27527	4.29861	4.76891	7.66634	1.75878
Bt.4447.2.S1_a_at	CYP19A1	cytochrome P450, family 19, subfamily A, polypeptide 1	NM_174305	1.53805e-09	13.1899	1.19233e-05	-3.37435	6.79542	6.38182	6.20886	6.54485	6.06123	6.25763	6.56167	6.10791	6.95097	5.84754		8.70833	10.4888	11.0895	10.086		4.44901	4.51869	4.79135	4.55744	4.76941		6.1901	1.42011
