# Supplementary material for: X-Ray fluorescence imaging and other analyses identify selenium and GPX1 as important in female reproductive function
Source: Royal Society of Chemistry journal article supplement (doi:10.1039/c4mt00228h), 2014-10-23
Supplement: c4mt00228h3.pdf [file c4mt00228h3.pdf]

**Article**

**X-Ray Fluorescence imaging and other analyses identifies selenium and GPX1 as important in female reproductive function – Supplementary Material**

Melanie J Ceko<sup>1</sup>, Katja Hummitzsch<sup>2</sup>, Nicholas Hatzirodos<sup>2</sup>, Wendy Bonner<sup>2</sup>, Jade B Aitken<sup>3</sup>,  
Darryl L Russell<sup>2</sup>, Michelle Lane<sup>2,4</sup>, Raymond J Rodgers<sup>2</sup>, Hugh H Harris<sup>1,\*</sup>

<sup>1</sup>School of Chemistry and Physics, The University of Adelaide, SA, 5005, Australia

<sup>2</sup>Research Centre for Reproductive Health, Discipline of Obstetrics and Gynaecology, School of Paediatrics and Reproductive Health, Robinson Research Institute, The University of Adelaide, SA, 5005, Australia

<sup>3</sup>School of Chemistry, The University of Sydney, NSW, 2006, Australia

<sup>4</sup>Repromed, Dulwich, SA, 5065, Australia

\*Corresponding author: School of Chemistry and Physics, The University of Adelaide, SA, 5005, Australia. Email address: [hugh.harris@adelaide.edu.au](mailto:hugh.harris@adelaide.edu.au)

## Supplementary Tables

Supplementary Table 1: Expression of selenoprotein signals in the granulosa cells of small healthy versus large healthy, as well as small atretic versus large healthy follicles

| Selenoprotein | Small healthy | Large healthy | Fold difference |
|---------------|---------------|---------------|-----------------|
| <i>GPX1</i>   | <u>12.3</u>   | <u>12.9</u>   | <u>1.5</u>      |
| <i>GPX4</i>   | <u>10.6</u>   | <u>10.9</u>   | <u>1.3</u>      |
| <i>GPX3</i>   | <b>8.6</b>    | <b>10.3</b>   | <b>3.2</b>      |
| <i>SEP15</i>  | <u>10.8</u>   | <u>11.1</u>   | <u>1.2</u>      |
| <i>SELH</i>   | 9.3           | 9.7           | 1               |
| <i>VIMP</i>   | <b>8.6</b>    | <b>9.8</b>    | <b>2.2</b>      |
| <i>SELK</i>   | <u>8.8</u>    | <u>9.7</u>    | <u>1.9</u>      |
| <i>SELT</i>   | 8.9           | 9.2           | 1.2             |
| <i>SELM</i>   | <b>6.6</b>    | <b>8.1</b>    | <b>2.9</b>      |
| <i>SEPHS2</i> | <u>7.4</u>    | <u>8.1</u>    | <u>1.7</u>      |

|               | Small atretic | Large healthy |             |
|---------------|---------------|---------------|-------------|
| <i>GPX1</i>   | <u>12.1</u>   | <u>12.9</u>   | <u>1.7</u>  |
| <i>GPX3</i>   | <b>6.2</b>    | <b>10.3</b>   | <b>17.4</b> |
| <i>GPX2</i>   | <b>5.3</b>    | <b>6.9</b>    | <b>3.0</b>  |
| <i>SEP15</i>  | <u>10.9</u>   | <u>11.1</u>   | <u>1.1</u>  |
| <i>VIMP</i>   | 9.7           | 9.8           | 1.1         |
| <i>SELK</i>   | 9.6           | 9.7           | 1.1         |
| <i>SELT</i>   | 8.8           | 9.2           | 1.3         |
| <i>SELM</i>   | <u>7.7</u>    | <u>8.1</u>    | <u>1.3</u>  |
| <i>SEPN1</i>  | 7.7           | 7.4           | 1.3         |
| <i>SEPHS2</i> | <u>7.8</u>    | <u>8.1</u>    | <u>1.3</u>  |

**Species is up-regulated in both comparisons**  
(*GPX1*, *GPX3*, *SEP15*, *VIMP*, *SELK*, *SELT*,  
*SELM*, *SEPHS2*)

Italics Up-regulation is minor (<1.5)

Underlined Up-regulation is moderate (1.5-2.0)

**Bold** Up-regulation is large (>2.0)

**Supplementary Table 2: Details of PCR primers**

| Gene name                        | Gene symbol | Amplicon size (bp) | Forward primer           | Reverse primer          | GenBank accession number |
|----------------------------------|-------------|--------------------|--------------------------|-------------------------|--------------------------|
| Glutathione peroxidase 1         | <i>GPXI</i> | 112                | CATCGCTCTGAGGCACAACGGT   | TGCCCAAACCTGGTTGCAGGGGA | NM_174076.3              |
| Glutathione peroxidase 3         | <i>GPX3</i> | 76                 | CTAGCCACCCTCAAGTATGTTTCG | TCACATCGCCTTTCTCAAACAGT | NM_174077.3              |
| VCP-interacting membrane protein | <i>VIMP</i> | 93                 | CTTACGCACGCTTTTTCACAG    | TATGCTGCCTTCAACCCTTG    | NM_001046114.2           |
| Selenoprotein M                  | <i>SELM</i> | 135                | TTAATCGCCTGAAGGAGGTG     | TTCGCTCCAGTTCCTCAAAG    | NM_001163171.1           |
